# Supplementary material for: Evaluation of click chemistry microarrays for immunosensing of alpha-fetoprotein (AFP)
Source: publisher site journal article supplement (doi:10.3762/bjnano.10.241), 2019-12-16
Supplement: Additional file 1 [file 2190-4286-10-241-S1.pdf]

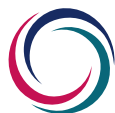

## Supporting Information

for

### **Evaluation of click chemistry microarrays for immunosensing of alpha-fetoprotein (AFP)**

Sayed Mohammad Mahdi Dadfar, Sylwia Sekula-Neuner, Vanessa Trouillet, Hui-Yu Liu, Ravi Kumar, Annie K. Powell and Michael Hirtz

*Beilstein J. Nanotechnol.* **2019**, *10*, 2505–2515. doi:10.3762/bjnano.10.241

## Additional figures

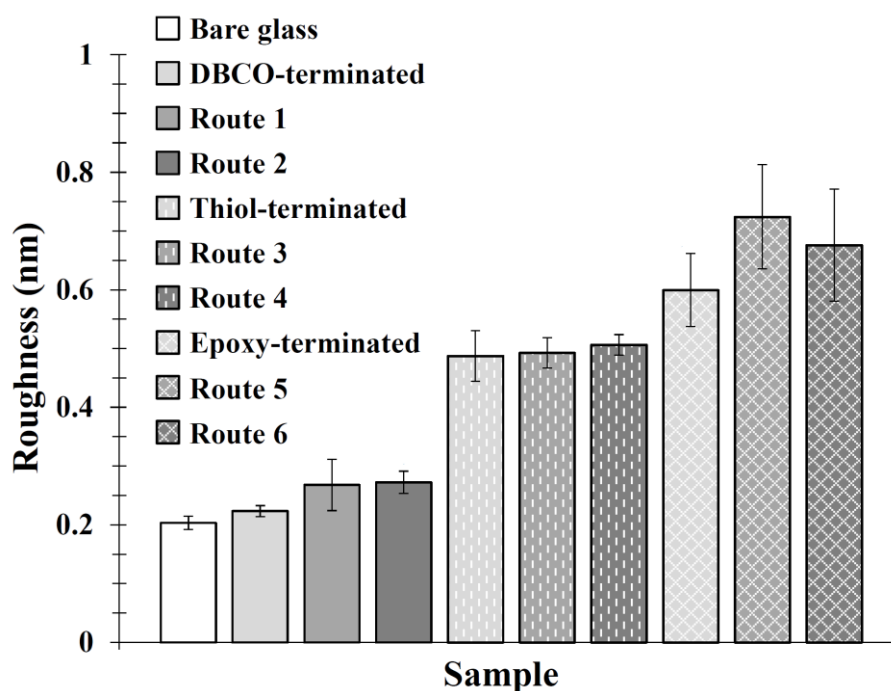

**Figure S1:** Roughness values determined by AFM test for the bare glass and hydroxyl-, DBCO-, thiol- and epoxy-terminated glasses as well as for samples of routes 1–6. The bare glass features a roughness of  $0.20 \pm 0.01$  nm. While DBCO functionalization by acid only slightly increases the roughness to  $0.22 \pm 0.01$  nm, the silanization of the thiol- and epoxy-terminated glasses leads to significantly higher roughness ( $0.49 \pm 0.04$  nm and  $0.60 \pm 0.06$  nm, respectively). This difference in roughness is probably caused by the possibility of crosslinking between silanes leading to a rougher surface. The next step in the different routes, the immobilization of biotin via a matching click reaction, does increase the roughness only slightly or even not significantly at all: on the DBCO-functionalized surfaces, adding of biotin-thiol (route 1) leads to a slightly increased roughness of  $0.27 \pm 0.04$  nm, and biotin-azide (route 2) yields  $0.27 \pm 0.02$  nm. On the thiol-terminated glass, no significant further increase of the roughness is observed for biotin-maleimide (route 3) with  $0.50 \pm 0.03$  nm and biotin-DBCO (route 4) with  $0.51 \pm 0.02$  nm. The epoxy-terminated glass shows a slight increase in roughness for biotin-amine (route 5) with  $0.72 \pm 0.09$  nm and biotin-thiol (route 6) with  $0.68 \pm 0.10$  nm.

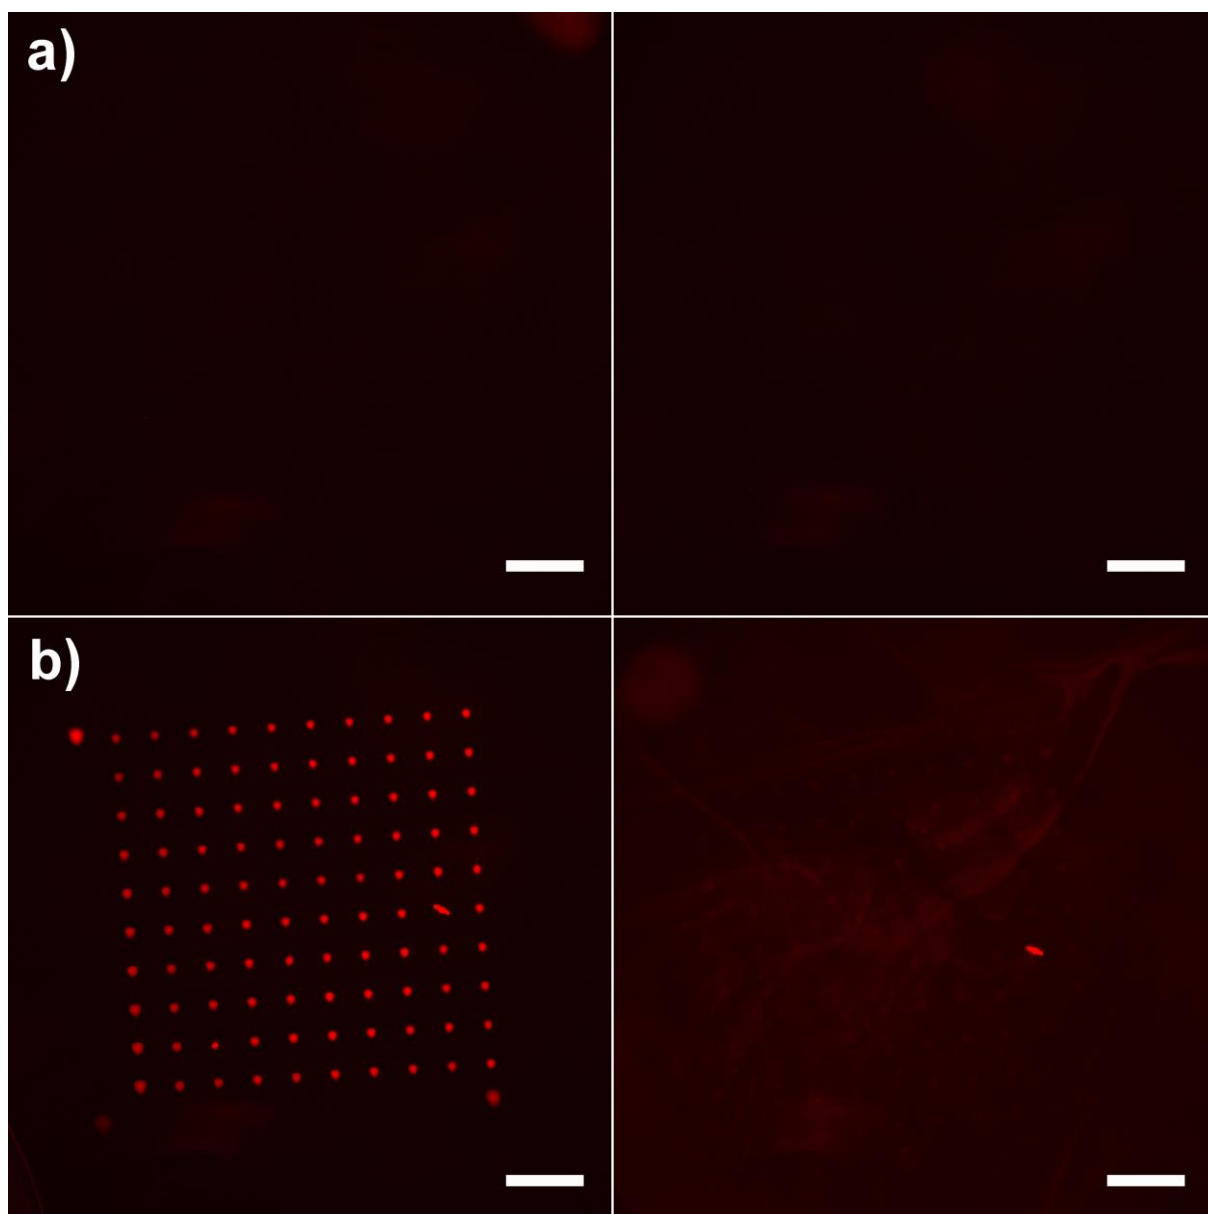

**Figure S2:** Control experiments for AFP sensing. a) negative control (no AFP present) before (left) and after (right) washing. No fluorescence is detected. b) control with Cy3 labeled streptavidin (50 µg/mL) before (left) and after (right) washing. The fluorescence intensity before and after washing decreases from  $(9622.3 \pm 655.8)$  a.u. to  $(384.6 \pm 180.4)$  a.u. indicating only minor unspecific binding of the labeled streptavidin. Scale bars equal 100 µm in all images.

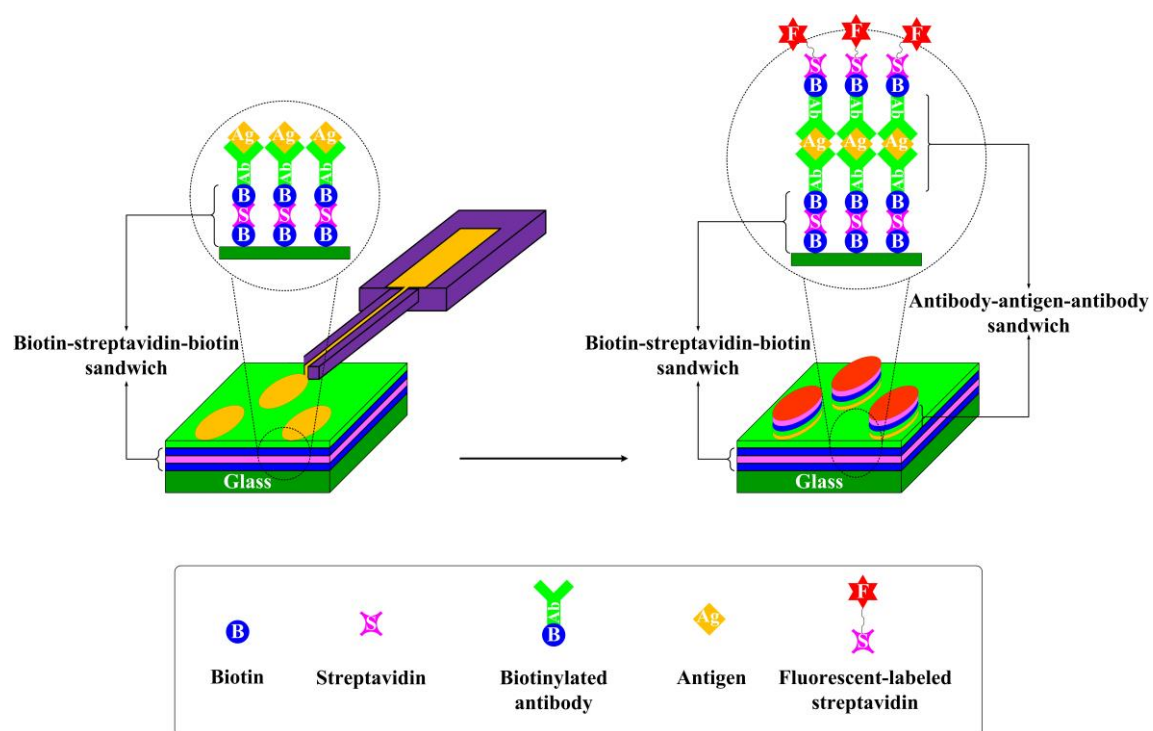

**Figure S3:** Detection of unlabeled AFP by the additional sandwich approach via a second binding of the biotinylated antibody and fluorescent-labeled streptavidin.

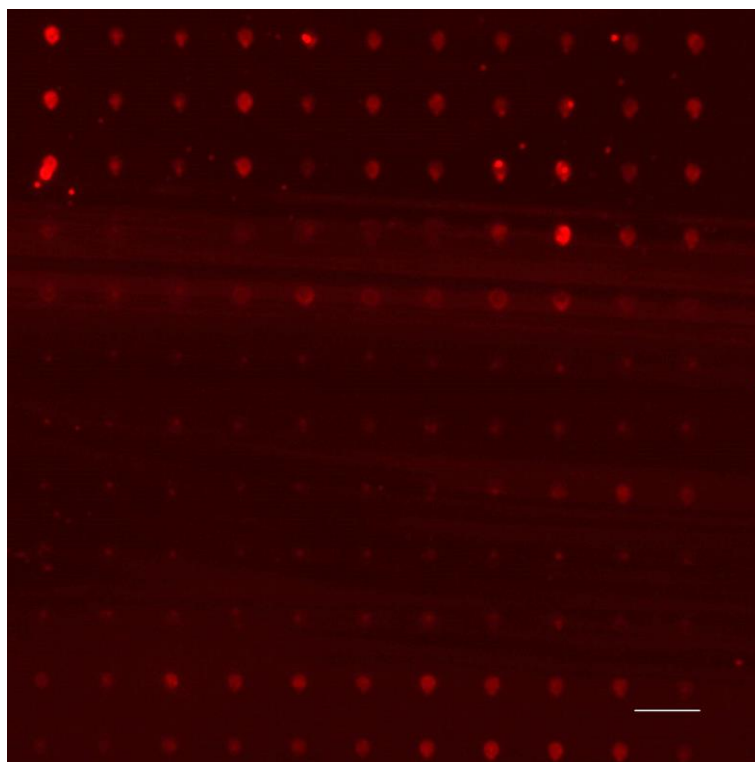

**Figure S4:** Fluorescence microscope image of the micropattern obtained from unlabeled AFP after implementation of the incubation step with fluorescent-labeled streptavidin. Scale bar equals 50  $\mu\text{m}$ .
